# Supplementary material for: Identification of novel PANDAR protein interaction partners involved in splicing regulation
Source: PubMed Central journal article supplement (PMC5809411; doi:10.1038/s41598-018-21105-6), 2018-02-12
Supplement: 41598_2018_21105_MOESM1_ESM.pdf [file 41598_2018_21105_MOESM1_ESM.pdf]

## **Identification of novel *PANDAR* protein interaction partners involved in splicing regulation**

Pospiech, N.<sup>1</sup>, Cibis, H.<sup>1</sup>, Dietrich, L.<sup>1</sup>, Müller, F.<sup>2</sup>, Bange, T.<sup>2,3</sup>, Hennig, S.\*<sup>1,4</sup>

<sup>1</sup>Chemical Genomics Centre of the Max-Planck Society, Otto-Hahn-Str. 11, 44227 Dortmund, Germany

<sup>2</sup>Max-Planck Institute of Molecular Physiology, Otto-Hahn-Str. 11, 44227 Dortmund, Germany

<sup>3</sup>Institute of Medical Psychology, LMU Munich, Goethe-Str. 31, 80336 Munich, Germany

<sup>4</sup>Vrije Universiteit Amsterdam, de Boelelaan 1108, 1081HZ Amsterdam, Netherlands

### **\*Corresponding author:**

Dr. Sven Hennig

de Boelelaan 1108

1081HZ Amsterdam, Netherlands

email: s.hennig@vu.nl

Supplemental Material:

Supplemental Figure S1:

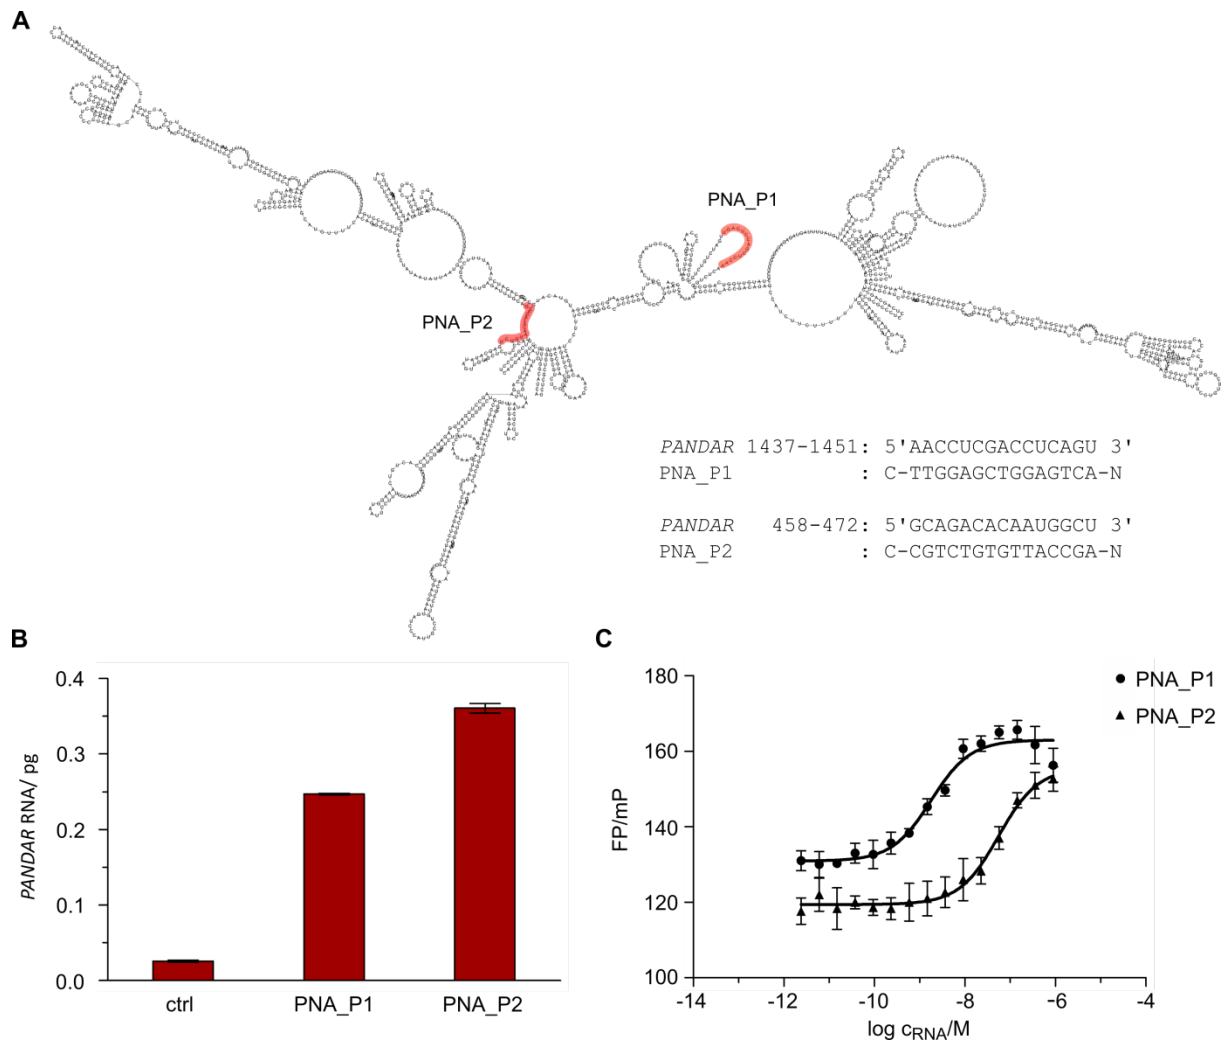

**Figure S1:** **a:** Secondary structure prediction (mfold) of *PANDAR* RNA. Red lines: binding sites of designed antisense PNA probes. Inlay: sequence of PNA probes with its according *PANDAR* sequence, numbers indicate base pair positions within *PANDAR* full length. **b:** *PANDAR* RNA enrichment from total isolated RNA from human osteosarcoma cells via biotinylated PNA probes. Both PNA probes were able to immobilize *PANDAR* RNA on streptavidin matrix over beads-only control (ctrl). **c:** Analysis of *PANDAR*-PNA binding by fluorescent polarization measurement shows an affinity in the nanomolar range with the best *PANDAR* targeting PNA\_P1 ( $K_D = 1.8$  nM).

## Supplemental Figure S2:

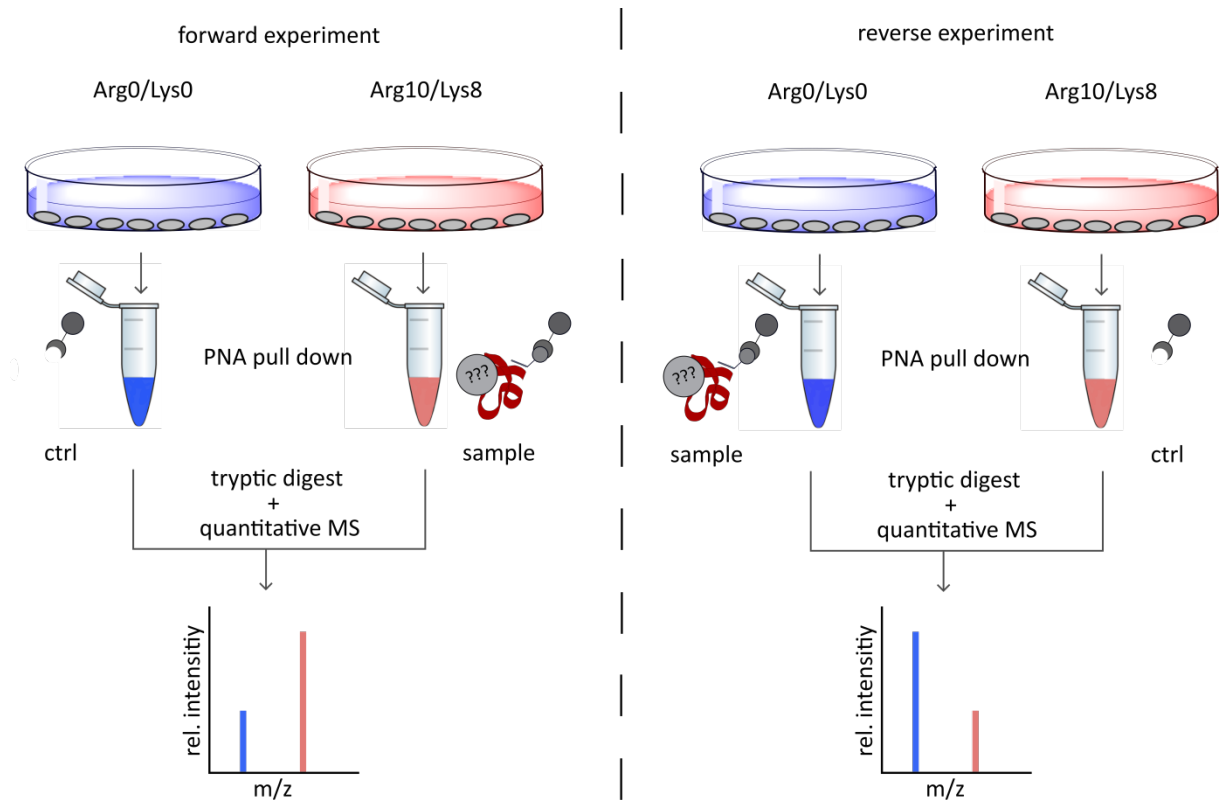

**Figure S2: Experimental workflow of PNA-based RNA pull-down combined with SILAC.** U2 OS cells were treated with light (indicated by blue color) or heavy SILAC media (indicated by red color) for subsequent quantitative mass spectrometry. Pull-down probe was performed by combining in vitro transcribed *PANDAR* RNA, *PANDAR* targeting biotinylated PNA probe (PNA\_P1 or PNA\_P2) and streptavidin beads (sample) or beads alone (control). For forward experimental setups (left panel), lysates from U-2 OS cells treated with heavy media were incubated with sample complex and lysate from light cultivated cells was incubated with beads only (control). For reverse experimental setups (right panel), pull-down probes were added vice versa. After tryptic digest of bound proteins quantitative mass spectrometry was performed. Ratios of light and heavy relative peak intensities were calculated for each experiment (= sample/control).

**Supplemental Figure S3:**

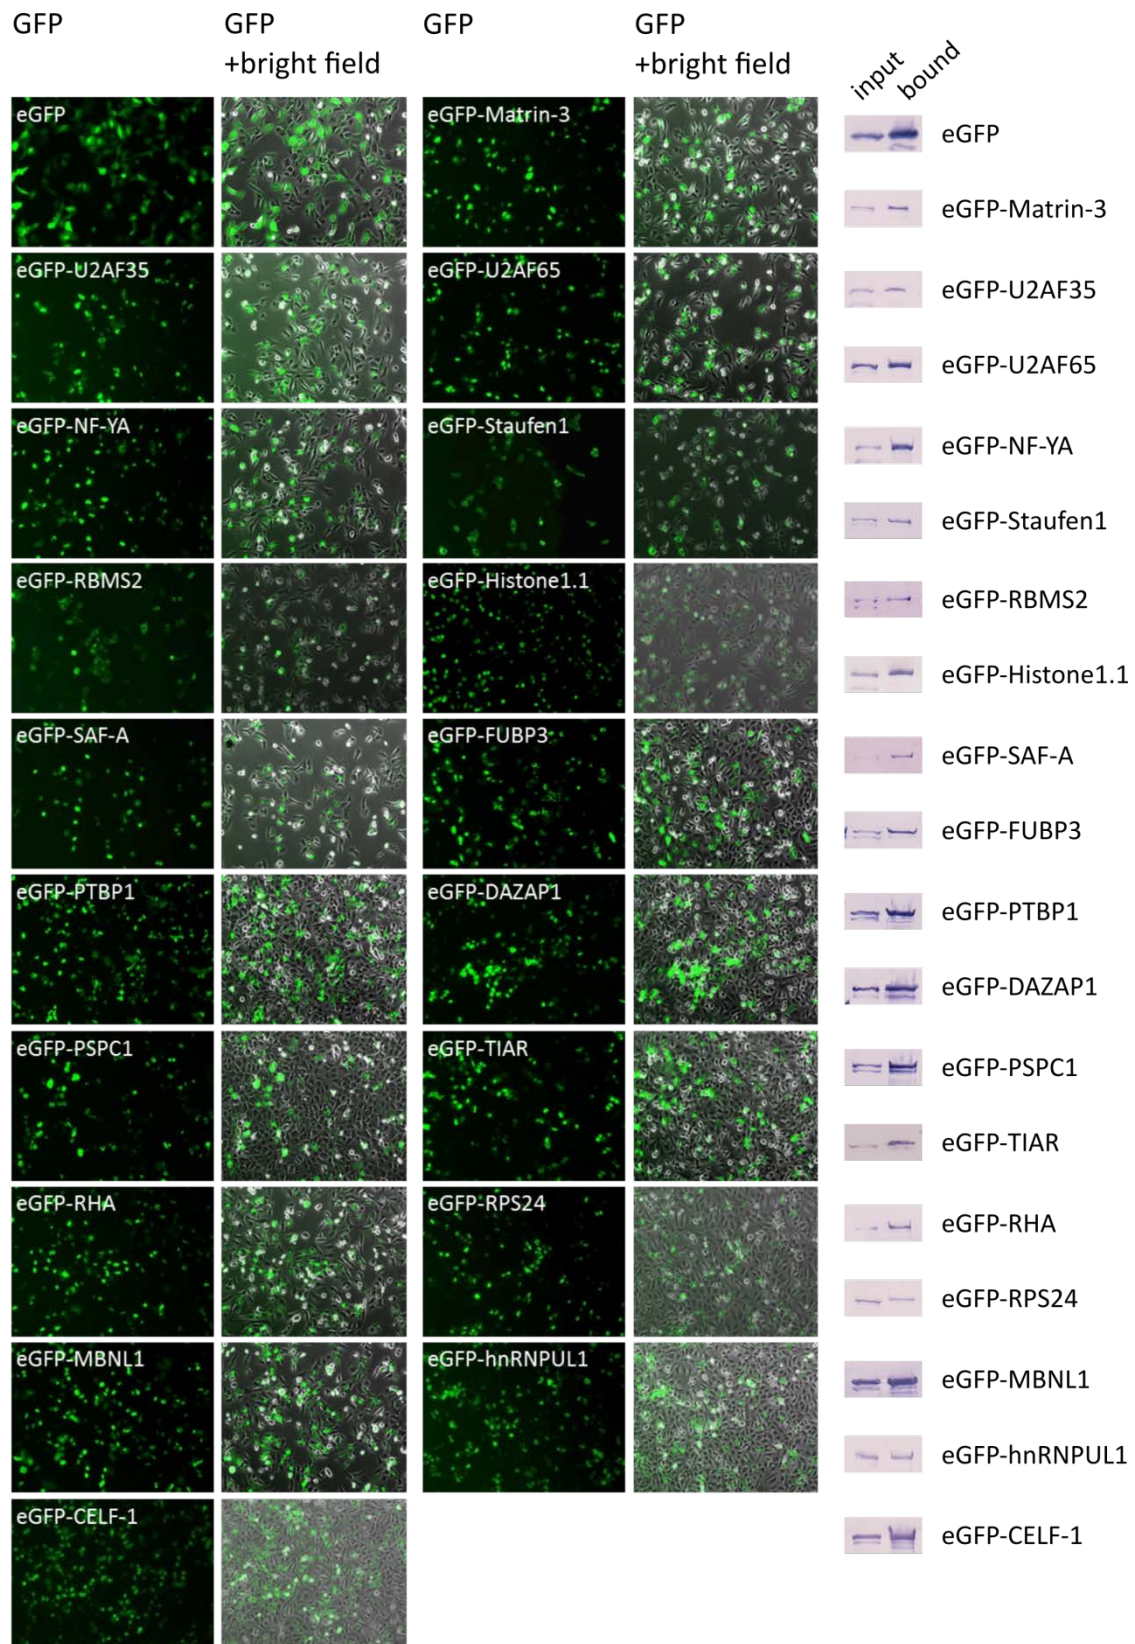

**Figure S3: Transfection of *PANDAR* overexpressing U-2 OS cells with hit candidates as eGFP-fusions.** Left panel shows eGFP transfected, *PANDAR* overexpressing U2 OS cells including merge of bright field image. Right panel shows western blot analyses of overexpressed and immunoprecipitated full length eGFP-fusion proteins.

Supplemental Figure S4:

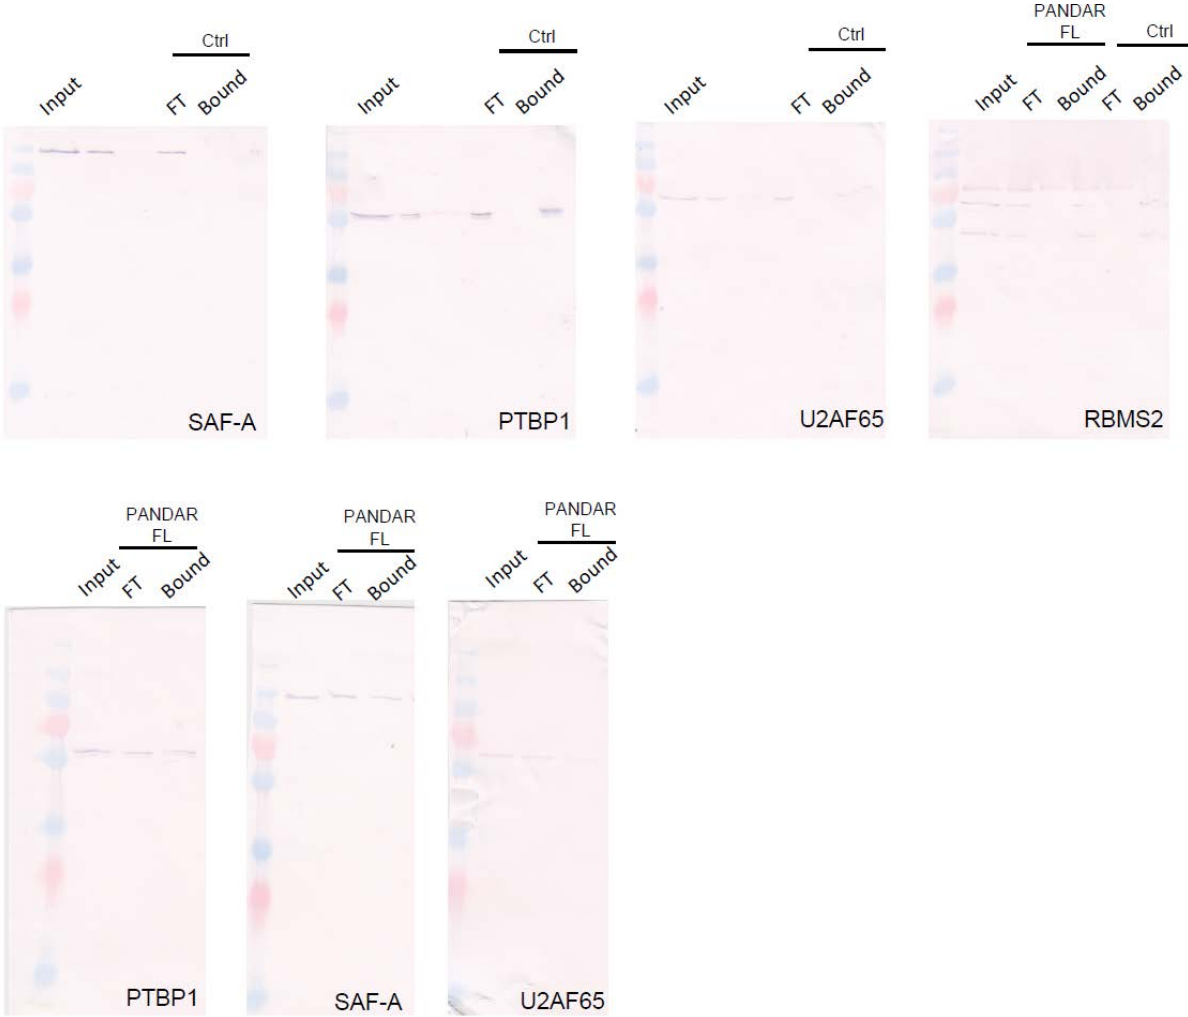

Figure S4: Full scale blots from main figure 2.

Supplemental Figure S5:

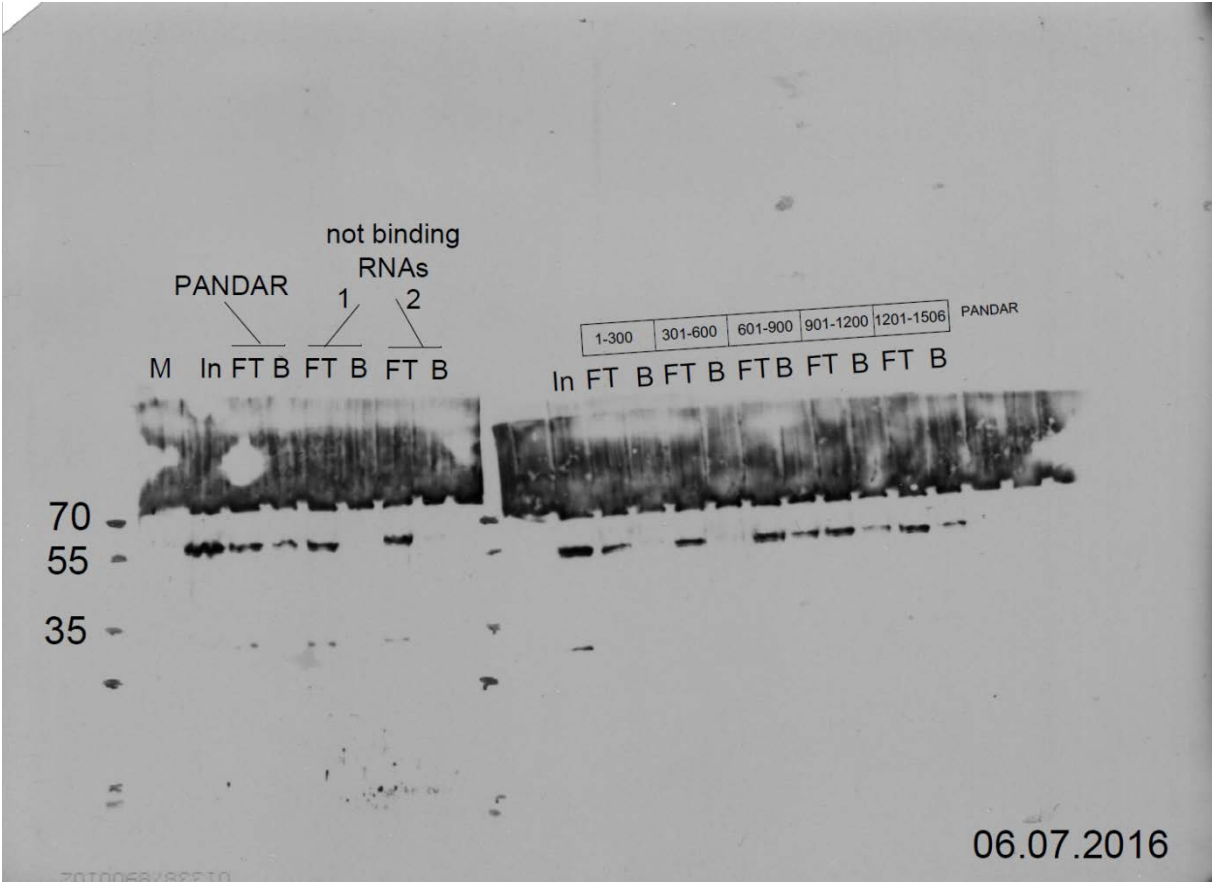

Figure S5: Full scale blots from main figure 3.

**Supplemental Figure S6:**

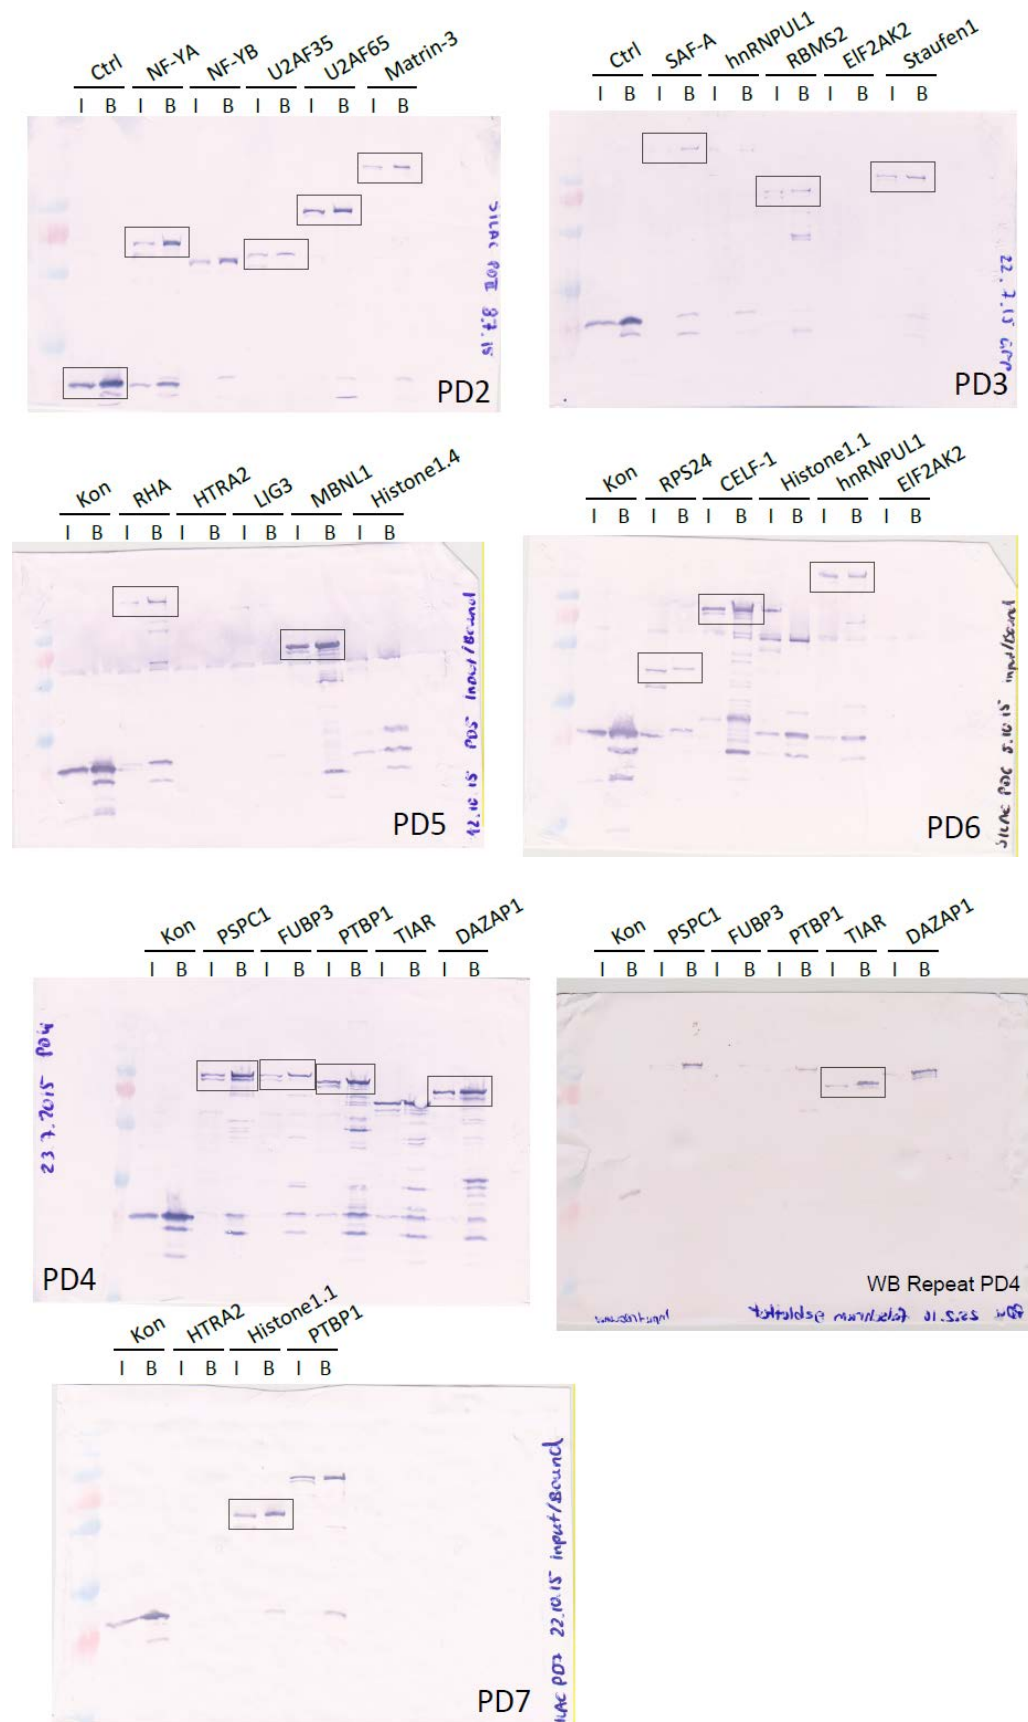

**Figure S6: Full scale blots from supplement figure S3.**
